# Supplementary material for: Identification of QTN and candidate genes for Salinity Tolerance at the Germination and Seedling Stages in Rice by Genome-Wide Association Analyses
Source: PubMed Central journal article supplement (PMC5916932; doi:10.1038/s41598-018-24946-3), 2018-04-25
Supplement: 41598_2018_24946_MOESM1_ESM.pdf [file 41598_2018_24946_MOESM1_ESM.pdf]

# **Identification of QTN and candidate genes for Salinity Tolerance at the Germination and Seedling Stages in Rice by Genome-Wide Association**

## **Analyses**

Shahzad Amir Naveed<sup>1</sup>, Fan Zhang<sup>1</sup>, Jian Zhang<sup>1</sup>, Tian-Qing Zheng<sup>1</sup>, Li-Jun Meng<sup>1,2</sup>, Yun-Long Pang<sup>1</sup>, Jian-Long Xu<sup>1,2\*</sup>, Zhi-Kang Li<sup>1,2\*</sup>

<sup>1</sup> Institute of Crop Sciences/National Key Facility for Crop Gene Resources and Genetic Improvement, Chinese Academy of Agricultural Sciences, 12 South Zhong-Guan-Cun Street, Beijing, China,

<sup>2</sup> Shenzhen Institute of Breeding and Innovation, Chinese Academy of Agricultural Sciences, Shenzhen, China

\*Correspondence: Zhi-Kang Li (email: [lizhikang@caas.cn](mailto:lizhikang@caas.cn)), Jian-Long Xu (email: [xujlcaas@126.com](mailto:xujlcaas@126.com); Tel: 010-82105854)

Running Title: GWAS for Salt tolerance in Rice

**Supplementary Table S1:** ANOVA for the measured traits under salinity for 208 *indica* rice germplasm.

| Trait | Source of | df  | SS         | MS      | F       | P- value | R <sup>2</sup> (%) |
|-------|-----------|-----|------------|---------|---------|----------|--------------------|
| RL    | Genotypes | 207 | 214.262    | 1.035   | 26.975  | <0.0001  | 87.3               |
|       | Rep.      | 1   | 0.002      | 0.002   | 0.050   | 0.823    |                    |
|       | Residuals | 208 | 7.981      | 0.038   |         |          |                    |
|       | Total     | 415 | 222.245    |         |         |          |                    |
| SL    | Genotypes | 207 | 161.477    | 0.780   | 54.508  | <0.0001  | 95.2               |
|       | Rep.      | 1   | 0.092      | 0.092   | 6.451   | 0.012    |                    |
|       | Residuals | 208 | 2.977      | 0.014   |         |          |                    |
|       | Total     | 415 | 164.546    |         |         |          |                    |
| GR    | Genotypes | 207 | 196724.885 | 950.362 | 495.316 | <0.0001  | 82.4               |
|       | Rep.      | 1   | 62.931     | 62.931  | 32.799  | 0.0001   |                    |
|       | Residuals | 208 | 399.089    | 1.919   |         |          |                    |
|       | Total     | 415 | 197186.905 |         |         |          |                    |
| RDW   | Genotypes | 207 | 0.040      | 0.000   | 50.706  | <0.0001  | 86.1               |
|       | Rep.      | 1   | 0.000      | 0.000   | 1.065   | 0.303    |                    |
|       | Residuals | 208 | 0.001      | 0.000   |         |          |                    |
|       | Total     | 415 | 0.041      |         |         |          |                    |
| SDW   | Genotypes | 207 | 0.616      | 0.003   | 3.945   | <0.0001  | 51.3               |
|       | Rep.      | 1   | 0.032      | 0.032   | 42.195  | 0.0001   |                    |
|       | Residuals | 208 | 0.157      | 0.001   |         |          |                    |
|       | Total     | 415 | 0.804      |         |         |          |                    |
| SST   | Genotypes | 207 | 792.632    | 3.829   | 10.966  | <0.0001  | 79.3               |
|       | Rep.      | 1   | 0.868      | 0.868   | 2.485   | 0.116    |                    |
|       | Residuals | 208 | 72.632     | 0.349   |         |          |                    |
|       | Total     | 415 | 866.132    |         |         |          |                    |
| SSD   | Genotypes | 207 | 259.608    | 1.254   | 7.648   | <0.0001  | 76.77              |
|       | Rep.      | 1   | 3.437      | 3.437   | 20.961  | 0.0001   |                    |
|       | Residuals | 208 | 34.108     | 0.164   |         |          |                    |
|       | Total     | 415 | 297.154    |         |         |          |                    |
| RNa   | Genotypes | 207 | 29.448     | 0.142   | 88.241  | <0.0001  | 87.2               |
|       | Rep.      | 1   | 0.004      | 0.004   | 2.678   | 0.103    |                    |
|       | Residuals | 208 | 0.335      | 0.002   |         |          |                    |
|       | Total     | 415 | 29.787     |         |         |          |                    |
| SNa   | Genotypes | 207 | 148.107    | 0.715   | 80.852  | <0.0001  | 85.2               |
|       | Rep.      | 1   | 0.023      | 0.023   | 2.626   | 0.107    |                    |
|       | Residuals | 208 | 1.841      | 0.009   |         |          |                    |
|       | Total     | 415 | 149.971    |         |         |          |                    |
| RKC   | Genotypes | 207 | 6.708      | 0.032   | 291.332 | <0.0001  | 90.5               |

|     |           |     |         |       |        |         |      |
|-----|-----------|-----|---------|-------|--------|---------|------|
|     | Rep.      | 1   | 0.000   | 0.000 | 0.547  | 0.461   |      |
|     | Residuals | 208 | 0.023   | 0.000 |        |         |      |
|     | Total     | 415 | 6.731   |       |        |         |      |
| SKC | Genotypes | 207 | 9.273   | 0.045 | 89.813 | <0.0001 | 92.3 |
|     | Rep.      | 1   | 0.001   | 0.001 | 1.990  | 0.160   |      |
|     | Residuals | 208 | 0.104   | 0.000 |        |         |      |
|     | Total     | 415 | 9.378   |       |        |         |      |
| RNK | Genotypes | 207 | 399.556 | 1.930 | 89.533 | <0.0001 | 96.7 |
|     | Rep.      | 1   | 0.014   | 0.014 | 0.650  | 0.421   |      |
|     | Residuals | 208 | 4.484   | 0.022 |        |         |      |
|     | Total     | 415 | 404.054 |       |        |         |      |
| SNK | Genotypes | 207 | 198.896 | 0.961 | 50.557 | <0.0001 | 95.3 |
|     | Rep.      | 1   | 0.031   | 0.031 | 1.625  | 0.204   |      |
|     | Residuals | 208 | 3.953   | 0.019 |        |         |      |
|     | Total     | 415 | 202.880 |       |        |         |      |

**Supplementary Table S2:** Allelic distribution of the 22 candidate genes for eight important QTL regions.

| QTL           | position   | REF<->ALT | +/- | ID                | CODEN      | AAA    | NonSyn |
|---------------|------------|-----------|-----|-------------------|------------|--------|--------|
| <i>qSNK1</i>  | 1-11460354 | G<->K     | -   | <i>Os01g20160</i> | GAC<->GAA; | D<->E; | 0.5    |
| <i>qSNK1</i>  | 1-11462858 | G<->S     | -   | <i>Os01g20160</i> | CCA<->GCA; | P<->A; | 0.5    |
| <i>qSNK1</i>  | 1-11527219 | A<->R     | +   | <i>Os01g20720</i> | AAT<->AGT; | N<->S; | 0.5    |
| <i>qSNK1</i>  | 1-11528968 | A<->R     | +   | <i>Os01g20720</i> | AAA<->AGA; | K<->R; | 0.5    |
| <i>qSNK12</i> | 12-4046018 | G<->R     | +   | <i>Os12g07970</i> | CGT<->CAT; | R<->H; | 0.5    |
| <i>qSNK12</i> | 12-4046366 | C<->Y     | +   | <i>Os12g07970</i> | ACT<->ATT; | T<->I; | 0.5    |
| <i>qSNK12</i> | 12-4056582 | G<->S     | -   | <i>Os12g07990</i> | CCT<->CGT; | P<->R; | 0.5    |
| <i>qSNK12</i> | 12-4058485 | C<->Y     | -   | <i>Os12g07990</i> | GTC<->ATC; | V<->I; | 0.5    |
| <i>qSNK12</i> | 12-4083192 | A<->R     | +   | <i>Os12g08030</i> | ACT<->GCT; | T<->A; | 0.5    |
| <i>qSNK12</i> | 12-4089798 | G<->R     | -   | <i>Os12g08040</i> | ACG<->ATG; | T<->M; | 0.5    |
| <i>qSNK12</i> | 12-4089813 | A<->R     | -   | <i>Os12g08040</i> | GTG<->GCG; | V<->A; | 0.5    |
| <i>qSNK12</i> | 12-4089972 | G<->R     | -   | <i>Os12g08040</i> | CCG<->CTG; | P<->L; | 0.5    |
| <i>qSNK12</i> | 12-4090089 | C<->M     | -   | <i>Os12g08040</i> | TGG<->TTG; | W<->L; | 0.5    |
| <i>qSNC1</i>  | 1-23776512 | T<->Y     | +   | <i>Os01g41930</i> | ATG<->ACG; | M<->T; | 0.5    |
| <i>qSNC1</i>  | 1-23776967 | T<->Y     | +   | <i>Os01g41930</i> | TTT<->CTT; | F<->L; | 0.5    |
| <i>qSNC1</i>  | 1-23845674 | A<->W     | +   | <i>Os01g42040</i> | AAA<->AAT; | K<->N; | 0.5    |
| <i>qSNC1</i>  | 1-23845952 | G<->R     | +   | <i>Os01g42040</i> | AGC<->AAC; | S<->N; | 0.5    |
| <i>qSNC1</i>  | 1-23846057 | A<->R     | +   | <i>Os01g42040</i> | GAA<->GGA; | E<->G; | 0.5    |
| <i>qSNC1</i>  | 1-23846329 | G<->K     | +   | <i>Os01g42040</i> | GAT<->TAT; | D<->Y; | 0.5    |
| <i>qSNC6</i>  | 6-17556991 | T<->W     | +   | <i>Os06g30390</i> | CTA<->CAA; | L<->Q; | 0.5    |
| <i>qSNC6</i>  | 6-17559929 | G<->S     | +   | <i>Os06g30390</i> | AGT<->ACT; | S<->T; | 0.5    |
| <i>qSNC6</i>  | 6-17587542 | T<->Y     | -   | <i>Os06g30440</i> | AGC<->GGC; | S<->G; | 0.5    |
| <i>qSNC6</i>  | 6-17587551 | T<->Y     | -   | <i>Os06g30440</i> | ACC<->GCC; | T<->A; | 0.5    |
| <i>qSNC6</i>  | 6-17588990 | T<->K     | -   | <i>Os06g30440</i> | TAT<->TCT; | Y<->S; | 0.5    |
| <i>qRNK2</i>  | 2-24278786 | C<->M     | +   | <i>Os02g40100</i> | GCG<->GAG; | A<->E; | 0.5    |
| <i>qRNK2</i>  | 2-24279269 | C<->S     | +   | <i>Os02g40100</i> | GCT<->GGT; | A<->G; | 0.5    |
| <i>qRNK2</i>  | 2-24279275 | A<->R     | +   | <i>Os02g40100</i> | AAT<->AGT; | N<->S; | 0.5    |
| <i>qRNK2</i>  | 2-24279370 | A<->R     | +   | <i>Os02g40100</i> | ATA<->GTA; | I<->V; | 0.5    |
| <i>qRNK2</i>  | 2-24280080 | C<->M     | +   | <i>Os02g40100</i> | CAT<->AAT; | H<->N; | 0.5    |
| <i>qRNK2</i>  | 2-24280353 | A<->R     | +   | <i>Os02g40100</i> | ATG<->GTG; | M<->V; | 0.5    |
| <i>qRNK2</i>  | 2-24288919 | A<->W     | -   | <i>Os02g40120</i> | TTT<->TAT; | F<->Y; | 0.5    |
| <i>qRNK2</i>  | 2-24289438 | C<->S     | -   | <i>Os02g40120</i> | GTC<->CTC; | V<->L; | 0.5    |
| <i>qRNK2</i>  | 2-24289637 | G<->R     | -   | <i>Os02g40120</i> | TCA<->TTA; | S<->L; | 0.5    |
| <i>qRNK2</i>  | 2-24316864 | G<->R     | +   | <i>Os02g40180</i> | GTG<->ATG; | V<->M; | 0.5    |
| <i>qRNK2</i>  | 2-24317291 | C<->Y     | +   | <i>Os02g40180</i> | ACC<->ATC; | T<->I; | 0.5    |
| <i>qRNK2</i>  | 2-24381277 | T<->Y     | -   | <i>Os02g40270</i> | GAG<->GGG; | E<->G; | 0.5    |
| <i>qRNK2</i>  | 2-24381350 | T<->Y     | -   | <i>Os02g40270</i> | ACT<->GCT; | T<->A; | 0.5    |
| <i>qRNK2</i>  | 2-24381432 | T<->K     | -   | <i>Os02g40270</i> | GAA<->GAC; | E<->D; | 0.5    |

|               |            |       |   |                   |            |        |     |
|---------------|------------|-------|---|-------------------|------------|--------|-----|
| <i>qRNK2</i>  | 2-24381530 | A<->W | - | <i>Os02g40270</i> | TGC<->AGC; | C<->S; | 0.5 |
| <i>qRNK2</i>  | 2-24381665 | G<->K | - | <i>Os02g40270</i> | AAC<->AAA; | N<->K; | 0.5 |
| <i>qRNK2</i>  | 2-24394913 | A<->W | - | <i>Os02g40280</i> | TAT<->TAA; | Y<->U; | 0.5 |
| <i>qRNK2</i>  | 2-24395150 | A<->W | - | <i>Os02g40280</i> | ATA<->AAA; | I<->K; | 0.5 |
| <i>qRNK2</i>  | 2-24395800 | T<->Y | - | <i>Os02g40280</i> | CAA<->CGA; | Q<->R; | 0.5 |
| <i>qSDW9a</i> | 9-1770943  | A<->R | - | <i>Os09g03590</i> | TTC<->CTC; | F<->L; | 0.5 |
| <i>qSDW9a</i> | 9-1771405  | C<->Y | - | <i>Os09g03590</i> | GAG<->AAG; | E<->K; | 0.5 |
| <i>qSDW9a</i> | 9-1771758  | C<->Y | - | <i>Os09g03590</i> | GTG<->ATG; | V<->M; | 0.5 |
| <i>qSDW9a</i> | 9-1772281  | T<->K | - | <i>Os09g03590</i> | GAA<->GAC; | E<->D; | 0.5 |
| <i>qSDW9a</i> | 9-1845864  | A<->R | - | <i>Os09g03670</i> | TGC<->CGC; | C<->R; | 0.5 |
| <i>qSDW9a</i> | 9-1846300  | G<->S | - | <i>Os09g03670</i> | TTC<->TTG; | F<->L; | 0.5 |
| <i>qSDW9a</i> | 9-1846370  | C<->Y | - | <i>Os09g03670</i> | CGC<->CAC; | R<->H; | 0.5 |
| <i>qSDW9a</i> | 9-1898693  | C<->Y | + | <i>Os09g03750</i> | CCA<->CTA; | P<->L; | 0.5 |
| <i>qSDW9a</i> | 9-1900233  | A<->R | + | <i>Os09g03750</i> | TAT<->TGT; | Y<->C; | 0.5 |
| <i>qSST5</i>  | 5-7039970  | C<->Y | + | <i>Os05g12270</i> | CGA<->TGA; | R<->U; | 0.5 |
| <i>qSST5</i>  | 5-7040229  | C<->Y | + | <i>Os05g12270</i> | CCG<->CTG; | P<->L; | 0.5 |
| <i>qSST5</i>  | 5-7040334  | G<->R | + | <i>Os05g12270</i> | TGG<->TAG; | W<->U; | 0.5 |
| <i>qSST5</i>  | 5-7056012  | C<->Y | + | <i>Os05g12290</i> | TCG<->TTG; | S<->L; | 0.5 |
| <i>qSST5</i>  | 5-7056096  | C<->Y | + | <i>Os05g12290</i> | GCG<->GTG; | A<->V; | 0.5 |
| <i>qSST5</i>  | 5-7056957  | G<->R | + | <i>Os05g12290</i> | TGT<->TAT; | C<->Y; | 0.5 |
| <i>qSST5</i>  | 5-7057038  | C<->Y | + | <i>Os05g12290</i> | TCG<->TTG; | S<->L; | 0.5 |
| <i>qSST5</i>  | 5-7057974  | A<->R | + | <i>Os05g12290</i> | AAT<->GAT; | N<->D; | 0.5 |
| <i>qSST5</i>  | 5-7058304  | C<->Y | + | <i>Os05g12290</i> | CAA<->TAA; | Q<->U; | 0.5 |
| <i>qSST9</i>  | 9-20727751 | C<->S | - | <i>Os09g35970</i> | GTG<->CTG; | V<->L; | 0.5 |
| <i>qGR3</i>   | 3-6902394  | A<->R | + | <i>Os03g12840</i> | GAC<->GGC; | D<->G; | 0.5 |
| <i>qGR3</i>   | 3-6906211  | C<->Y | + | <i>Os03g12840</i> | CTC<->CCC; | L<->P; | 0.5 |

**Supplementary Table S3: Haplotype analysis of 22 candidate genes for eight important QTL regions.**

| QTL               | ID                | Haplotype         | Genotypes | Trait mean | STD  |    |
|-------------------|-------------------|-------------------|-----------|------------|------|----|
| <i>qSNK1</i>      | <i>Os01g20160</i> | **                |           |            |      |    |
|                   |                   | CC                | 32        | 2.74       | 0.63 | a  |
|                   |                   | CG                | 14        | 1.9        | 0.85 | ab |
|                   | <i>Os01g20720</i> | AG                | 22        | 1.21       | 0.5  | b  |
|                   |                   | **                |           |            |      |    |
|                   |                   | AA                | 15        | 2.93       | 0.73 | a  |
|                   |                   | AG                | 10        | 1.98       | 1.01 | ab |
|                   |                   | GG                | 48        | 1.3        | 0.6  | b  |
|                   |                   |                   |           |            |      |    |
| <i>qSNK12</i>     | <i>Os12g07970</i> | GC                | 57        | 1.95       | 0.87 |    |
|                   |                   | AT                | 68        | 1.69       | 1.02 |    |
|                   |                   | **                |           |            |      |    |
|                   | <i>Os12g07990</i> | CA                | 46        | 3.7        | 0.54 | a  |
|                   |                   | GG                | 56        | 2.3        | 0.4  | b  |
|                   |                   | **                |           |            |      |    |
|                   | <i>Os12g08030</i> | A                 | 51        | 2.97       | 0.6  | a  |
|                   |                   | G                 | 57        | 1.2        | 0.5  | b  |
|                   |                   | **                |           |            |      |    |
|                   | <i>Os12g08040</i> | TTCG              | 18        | 2.94       | 0.92 |    |
|                   |                   | CTCG              | 25        | 1.98       | 0.65 |    |
|                   |                   | CCTG              | 28        | 2.61       | 0.84 |    |
|                   |                   | TCTT              | 29        | 2.15       | 0.75 |    |
|                   |                   | **                |           |            |      |    |
|                   | <i>qSNK1</i>      | <i>Os01g41930</i> | **        |            |      |    |
| TC                |                   |                   | 15        | 3.91       | 0.74 | a  |
| TT                |                   |                   | 37        | 3.31       | 0.95 | ab |
| CC                |                   |                   | 22        | 3.24       | 1    | ab |
| CT                |                   |                   | 18        | 2.18       | 0.63 | b  |
| <i>Os01g42040</i> |                   | TGAT              | 28        | 2.87       | 0.94 |    |
|                   |                   | TAAT              | 22        | 1.96       | 1.1  |    |
|                   |                   | AAGG              | 15        | 2.72       | 0.71 |    |
|                   |                   | AAAG              | 18        | 3.45       | 0.74 |    |
|                   |                   | **                |           |            |      |    |
| <i>qSNC6</i>      | <i>Os06g30390</i> | **                |           |            |      |    |
|                   |                   | TC                | 22        | 2.71       | 0.53 | a  |
|                   |                   | AG                | 38        | 2.18       | 0.97 | ab |
|                   | <i>Os06g30440</i> | AC                | 12        | 1.38       | 0.48 | b  |
|                   |                   | AAC               | 38        | 2.91       | 0.86 |    |
|                   |                   | AGA               | 36        | 2.47       | 0.86 |    |
|                   |                   | **                |           |            |      |    |

| QTL           | ID                | Haplotype | Genotypes | Trait mean | STD   |    |
|---------------|-------------------|-----------|-----------|------------|-------|----|
|               |                   | GGC       | 32        | 1.96       | 0.95  |    |
| <i>qRNK2</i>  | <i>Os02g40100</i> | **        |           |            |       |    |
|               |                   | CGGGAA    | 20        | 3.59       | 0.67  | a  |
|               |                   | CCAACG    | 12        | 2.58       | 0.97  | ab |
|               |                   | AGGGAA    | 26        | 1.24       | 0.59  | b  |
|               | <i>Os02g40120</i> | **        |           |            |       |    |
|               |                   | TGC       | 34        | 3.69       | 0.97  | a  |
|               |                   | ACC       | 30        | 2.87       | 1.01  | ab |
|               |                   | ACT       | 16        | 1.54       | 0.61  | b  |
|               | <i>Os02g40180</i> | **        |           |            |       |    |
|               |                   | AC        | 21        | 3.96       | 0.73  | a  |
|               |                   | GC        | 12        | 2.37       | 0.89  | ab |
|               |                   | GT        | 31        | 2.13       | 0.54  | b  |
|               | <i>Os02g40270</i> |           |           |            |       |    |
|               |                   | GGAAC     | 31        | 2.53       | 0.78  |    |
|               |                   | GAATA     | 36        | 1.95       | 1.03  |    |
|               |                   | AGCTA     | 22        | 2.86       | 0.96  |    |
|               |                   | AACAC     | 38        | 2.16       | 0.71  |    |
|               | <i>Os02g40280</i> | **        |           |            |       |    |
|               |                   | TCG       | 14        | 3.74       | 0.71  | a  |
|               |                   | AGA       | 26        | 3.14       | 0.94  | ab |
|               |                   | AGG       | 57        | 2.1        | 0.54  | b  |
| <i>qSDW9a</i> | <i>Os09g03590</i> |           |           |            |       |    |
|               |                   | GTGA      | 38        | 0.096      | 0.032 |    |
|               |                   | GCAA      | 40        | 0.089      | 0.016 |    |
|               |                   | CTAC      | 35        | 0.092      | 0.026 |    |
|               |                   | CCGA      | 46        | 0.088      | 0.027 |    |
|               | <i>Os09g03670</i> |           |           |            |       |    |
|               |                   | TCG       | 44        | 0.099      | 0.027 |    |
|               |                   | CCA       | 37        | 0.096      | 0.016 |    |
|               |                   | TGA       | 31        | 0.092      | 0.032 |    |
|               |                   | CGA       | 30        | 0.082      | 0.026 |    |
|               | <i>Os09g03750</i> | **        |           |            |       |    |
|               |                   | CA        | 14        | 0.13       | 0.009 | a  |
|               |                   | TA        | 65        | 0.096      | 0.009 | b  |
|               |                   | TG        | 74        | 0.092      | 0.009 | b  |
| <i>qSST5</i>  | <i>Os05g12270</i> |           |           |            |       |    |
|               |                   | CCG       | 75        | 8.5        | 1     |    |
|               |                   | CTA       | 53        | 7          | 1.5   |    |
|               |                   | TTA       | 18        | 6          | 2     |    |
|               | <i>Os05g12290</i> | **        |           |            |       |    |

| QTL          | ID                | Haplotype | Genotypes | Trait mean | STD |    |
|--------------|-------------------|-----------|-----------|------------|-----|----|
|              |                   | CCGCAC    | 32        | 8          | 1   | a  |
|              |                   | CTGCGT    | 45        | 6.5        | 1   | ab |
|              |                   | TCATAT    | 25        | 5.5        | 1   | b  |
| <i>qSST9</i> | <i>Os09g35970</i> | *         |           |            |     |    |
|              |                   | G         | 68        | 8          | 1   | a  |
|              |                   | C         | 26        | 5.5        | 1   | b  |
| <i>qGR3</i>  | <i>Os03g12840</i> | **        |           |            |     |    |
|              |                   | CT        | 32        | 50         | 9   | a  |
|              |                   | TC        | 36        | 30         | 8   | b  |

\*and \*\*Represents significance at  $P < 0.05$  and  $P < 0.01$ , respectively.

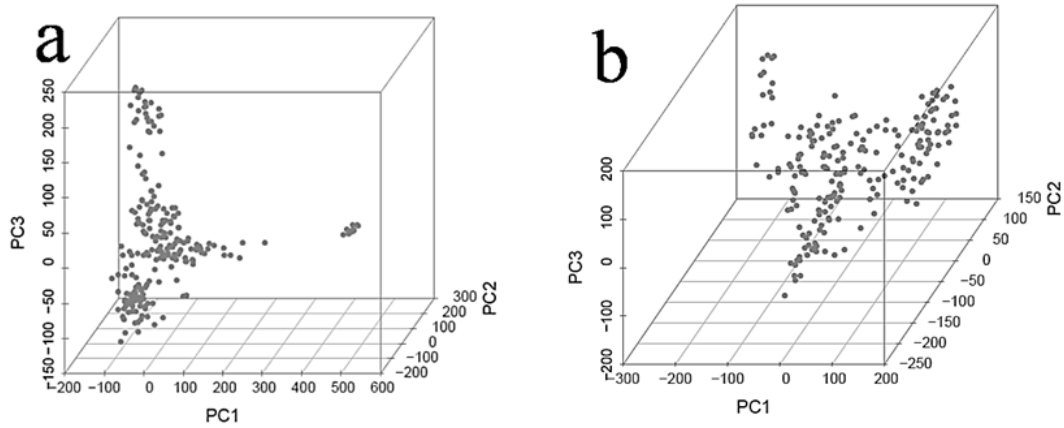

**Supplementary Figure S1:** PCA 3D plot of the first three principal components (PC) in 219 accessions (a) and 208 accessions (b), respectively.
